# Supplementary material
Source: PubMed Central journal article supplement (PMC2658655)
Supplement: rsif20080172s02.pdf [file rsif20080172s02.pdf]

## Supplementary material: Simulated datasets

### Deterministic Lotka-Volterra model

| t    | 1.1  | 2.4  | 3.9  | 5.6  | 7.5  | 9.6  | 11.9 | 14.4 |
|------|------|------|------|------|------|------|------|------|
| x(t) | 1.87 | 0.65 | 0.22 | 0.31 | 1.64 | 1.15 | 0.24 | 2.91 |
| y(t) | 0.49 | 2.62 | 1.54 | 0.02 | 1.14 | 1.68 | 1.07 | 0.88 |

Initial conditions:  $x(0) = 1$ ,  $y(0) = 0.5$

### Stochastic Lotka-Volterra model

| t    | 1.0    | 2.0    | 3.0    | 4.0   | 5.0    | 6.0    | 7.0    | 8.0    | 9.0    | 10.0  |
|------|--------|--------|--------|-------|--------|--------|--------|--------|--------|-------|
| x(t) | 1026.6 | 1007.9 | 998.5  | 876.6 | 1064.7 | 815.7  | 1047.0 | 780.0  | 1156.1 | 631.1 |
| y(t) | 1084.7 | 1053.9 | 1050.9 | 894.4 | 1258.5 | 640.8  | 1686.8 | 529.8  | 1937.6 | 449.0 |
| t    | 11.0   | 12.0   | 13.0   | 14.0  | 15.0   | 16.0   | 17.0   | 18.0   | 19.0   |       |
| x(t) | 1724.0 | 564.0  | 1424.8 | 377.2 | 2028.0 | 812.1  | 903.0  | 1575.3 | 466.8  |       |
| y(t) | 1177.3 | 560.1  | 1371.0 | 815.5 | 637.6  | 1338.8 | 287.2  | 1631.3 | 914.6  |       |

Initial conditions:  $x(0) = 1000$ ,  $y(0) = 1000$

### Deterministic repressilator model

| t        | 0.6   | 4.2   | 6.2   | 8.6   | 13.4  | 16.0  | 21.4  | 27.6  | 34.4  | 39.8  | 40.6  | 45.2  |
|----------|-------|-------|-------|-------|-------|-------|-------|-------|-------|-------|-------|-------|
| $m_1(t)$ | 2.04  | 32.19 | 4.13  | 2.15  | 5.09  | 1.07  | 3.67  | 39.01 | 73.83 | 8.54  | 17.62 | 11.96 |
| $m_2(t)$ | 28.99 | 11.29 | 10.61 | 55.27 | 9.49  | 68.56 | 10.62 | -1.95 | 3.53  | 63.87 | 39.68 | -0.60 |
| $m_3(t)$ | 20.96 | 7.49  | 44.25 | 7.12  | 60.52 | 8.10  | 63.76 | 22.90 | 6.27  | 10.59 | 6.50  | 70.56 |

Initial conditions:  $m_1(0) = 0$ ,  $p_1(0) = 2$ ,  $m_2(0) = 0$ ,  $p_2(0) = 1$ ,  $m_3(0) = 0$ ,  $p_3(0) = 3$

## Stochastic repressilator model

|          |       |       |       |       |       |       |       |       |       |       |       |       |
|----------|-------|-------|-------|-------|-------|-------|-------|-------|-------|-------|-------|-------|
| t        | 4.0   | 8.0   | 12.0  | 16.0  | 20.0  | 24.0  | 28.0  | 32.0  | 36.0  | 40.0  | 44.0  | 48.0  |
| $m_1(t)$ | 134.0 | 29.6  | 52.0  | 201.6 | 31.8  | 50.6  | 154.2 | 39.4  | 90.0  | 173.1 | 20.8  | 122.9 |
| $p_1(t)$ | 124.3 | 38.2  | 54.7  | 202.2 | 35.5  | 47.5  | 150.7 | 45.3  | 85.0  | 168.9 | 23.3  | 114.4 |
| $m_2(t)$ | 37.3  | 27.9  | 162.0 | 45.4  | 74.2  | 150.3 | 78.2  | 72.8  | 154.4 | 22.9  | 130.9 | 153.6 |
| $p_2(t)$ | 46.7  | 23.8  | 166.7 | 51.5  | 71.6  | 136.9 | 70.1  | 71.9  | 155.5 | 24.7  | 115.6 | 148.2 |
| $m_3(t)$ | 9.6   | 162.1 | 32.0  | 67.4  | 221.9 | 43.5  | 48.7  | 153.4 | 20.4  | 156.1 | 155.1 | 51.5  |
| $p_3(t)$ | 7.1   | 166.7 | 40.2  | 64.1  | 214.2 | 49.5  | 49.7  | 154.2 | 24.7  | 148.5 | 162.1 | 54.1  |
| t        | 52.0  | 56.0  | 60.0  | 64.0  | 68.0  | 72.0  | 76.0  |       |       |       |       |       |
| $m_1(t)$ | 128.9 | 31.6  | 119.4 | 142.6 | 68.5  | 104.6 | 132.3 |       |       |       |       |       |
| $p_1(t)$ | 133.8 | 28.3  | 110.6 | 136.7 | 67.7  | 93.8  | 130.4 |       |       |       |       |       |
| $m_2(t)$ | 60.5  | 117.6 | 185.6 | 46.1  | 126.8 | 151.2 | 52.8  |       |       |       |       |       |
| $p_2(t)$ | 57.8  | 116.3 | 179.6 | 49.3  | 113.8 | 157.3 | 46.4  |       |       |       |       |       |
| $m_3(t)$ | 107.3 | 117.7 | 30.8  | 135.1 | 143.1 | 56.5  | 133.7 |       |       |       |       |       |
| $p_3(t)$ | 116.8 | 119.2 | 36.3  | 123.9 | 139.9 | 53.2  | 126.4 |       |       |       |       |       |

Initial conditions:  $m_1(0) = 0$ ,  $p_1(0) = 2$ ,  $m_2(0) = 0$ ,  $p_2(0) = 1$ ,  $m_3(0) = 0$ ,  $p_3(0) = 3$

## SIR models

|      |       |       |       |      |      |      |      |      |      |      |      |      |
|------|-------|-------|-------|------|------|------|------|------|------|------|------|------|
| t    | 0.6   | 1     | 2     | 3    | 4    | 5    | 6    | 7    | 8    | 9    | 10   | 11   |
| S(t) | 0.12  | 0.12  | 0.10  | 0.38 | 1.00 | 1.20 | 1.46 | 1.38 | 1.57 | 1.46 | 1.25 | 1.56 |
| I(t) | 13.17 | 7.17  | 2.36  | 0.92 | 0.62 | 0.17 | 0.28 | 0.10 | 0.03 | 0.29 | 0.10 | 0.22 |
| R(t) | 9.42  | 11.19 | 10.04 | 6.87 | 4.45 | 3.01 | 1.76 | 1.29 | 0.82 | 0.52 | 0.23 | 0.20 |

Initial conditions:  $S(t) = 20$ ,  $I(t) = 10$ ,  $R(t) = 0$
